# Supplementary material for: Real-time measurement of phloem turgor pressure in Hevea brasiliensis with a modified cell pressure probe
Source: PubMed Central journal article supplement (PMC5432816; doi:10.1186/1999-3110-55-19), 2014-02-03

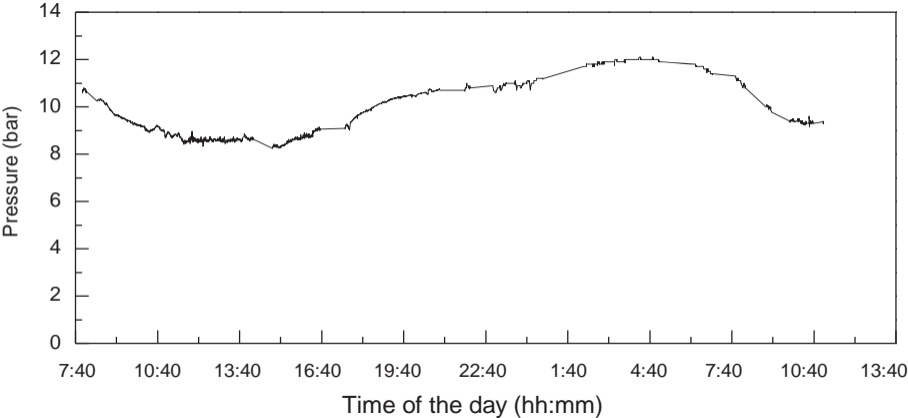

Supplement: 40529_2013_62_MOESM9_ESM.pdf [file 40529_2013_62_MOESM9_ESM.pdf]
